# Supplementary material
Source: publisher figshare collection journal article supplement (https://geolsoc.figshare.com/ndownloader/files/5423663)
Supplement: Supplementary file 1 [file 5423663]

Nam2 - Coal-bearing basins of the Basse-Loire (Roc quarry)
	Isotopic ratios							Apparent ages						Con (%)
Analyses							Rho
	207Pb/235U	± (1?)	206Pb/238U	± (1?)	207Pb/206Pb	± (1?)		206/ 238	± (1?)	207/ 235	± (1?)	207/ 206	± (1?)
hl11	10.4535	0.2535	0.4583	0.0109	0.1654	0.0007	0.98	2432	48	2476	66	2512	8	97
hl12	0.7389	0.0156	0.0914	0.0019	0.0586	0.0003	0.97	564	11	562	9	554	11	102
hl13	1.1102	0.0484	0.0987	0.0011	0.0815	0.0034	0.27	607	7	758	23	1235	80	49
hl14	0.6950	0.0127	0.0860	0.0015	0.0586	0.0004	0.93	532	9	536	8	554	15	96
hl15	0.6324	0.0055	0.0802	0.0003	0.0572	0.0004	0.44	497	2	498	3	499	17	100
hl16	3.5503	0.0514	0.2638	0.0035	0.0976	0.0006	0.92	1509	18	1538	11	1579	11	96
hl17	1.4431	0.0994	0.0957	0.0007	0.1094	0.0075	0.11	589	4	907	40	1789	120	33
hl18	0.8090	0.0150	0.0920	0.0013	0.0638	0.0007	0.79	568	8	602	8	734	24	77
hl19	1.0045	0.0494	0.1030	0.0018	0.0707	0.0032	0.36	632	11	706	25	949	91	67
hl20	0.7665	0.0155	0.0925	0.0017	0.0601	0.0005	0.93	570	10	578	9	607	16	94
hl21	0.9466	0.0154	0.1112	0.0014	0.0617	0.0006	0.78	680	8	676	8	664	22	102
hl22	6.4566	0.8092	0.1165	0.0103	0.4020	0.0358	0.70	710	59	2040	105	3917	128	18
hl25	1.2516	0.0211	0.1302	0.0017	0.0697	0.0008	0.76	789	9	824	9	920	23	86
hl26	0.7606	0.0485	0.0990	0.0015	0.0557	0.0035	0.24	608	9	574	28	442	132	138
hl27	13.1257	0.2398	0.5258	0.0065	0.1810	0.0024	0.67	2724	27	2689	17	2662	22	102
hl28	4.6316	0.0841	0.3070	0.0053	0.1094	0.0007	0.94	1726	26	1755	15	1790	11	96
hl29	12.9042	0.8084	0.4295	0.0250	0.2179	0.0050	0.93	2304	112	2673	57	2965	36	78
hl30	3.3611	0.4934	0.0832	0.0015	0.2929	0.0427	0.12	515	9	1495	109	3433	210	15
hl31	11.7217	0.2697	0.4958	0.0102	0.1715	0.0018	0.89	2596	44	2582	21	2572	17	101
hl32	6.0798	0.1018	0.3711	0.0056	0.1188	0.0009	0.90	2035	26	1987	14	1939	13	105
hl33	12.2424	0.2326	0.4985	0.0090	0.1781	0.0010	0.95	2607	39	2623	18	2636	10	99
hl34	2.8754	0.0457	0.2346	0.0027	0.0889	0.0010	0.73	1358	14	1375	12	1402	21	97
hl35	0.7365	0.0101	0.0837	0.0006	0.0638	0.0007	0.55	518	4	560	6	736	24	70
Isotopic ratios are corrected for the blank, for the inter-element fractionation and mas bias with the standard;
Apparent ages are calculated with Isoplot (Ludwig, 2004)
Errors are quoted at 1? confidence level;
Concordance is calculated as : C = [207/206] * 100 / [206/238]
